# Supplementary material
Source: Elsevier journal article supplement (https://api.immotoolbox.com/fiche/en/montecarlo/99519/pdfv3/mmc7.pdf)

## FOR RENT FONTVIEILLE 7 ROOMS WITH PRIVATE POOL

Rental Monaco

60 000 € / month

This beautiful flat is located on the top floor of a luxury residence with 24-hour security. The flat is in perfect condition, with spacious rooms and pleasant outdoor areas. The flat enjoys magnificent views over the sea and the port of Cap d'Ail. It comprises an entrance hall, a large living room, a dining room, a fully equipped kitchen, five en suite bedrooms with bathroom/shower and dressing room, including a very spacious master suite, a laundry room and a guest WC. The flat also has a private swimming pool and beach, as well as a garden terrace.

Two cellars and four parking spaces complete the flat.

|              |                    |              |              |
|--------------|--------------------|--------------|--------------|
| Product type | Penthouse/Roof     | Num rooms    | 5+           |
| Total area   | 702 m <sup>2</sup> | Num bedrooms | 5            |
| Living area  | 366 m <sup>2</sup> | Num parking  | 4            |
| Terrace area | 126 m <sup>2</sup> | Num cellars  | 1            |
| Garden area  | 210 m <sup>2</sup> | Building     | Memmo Center |
| Release date | 01/06/2024         | District     | Fontvieille  |

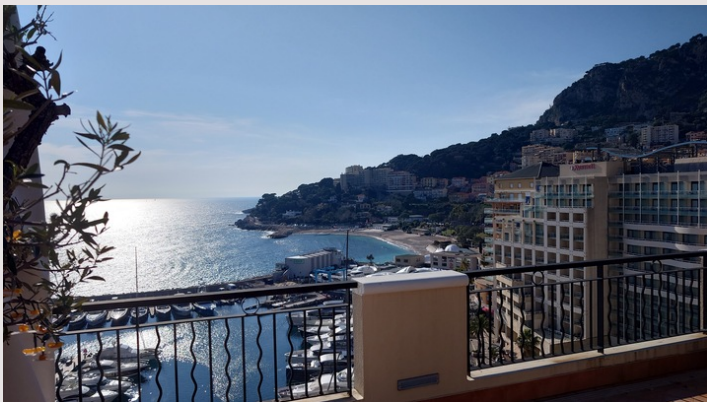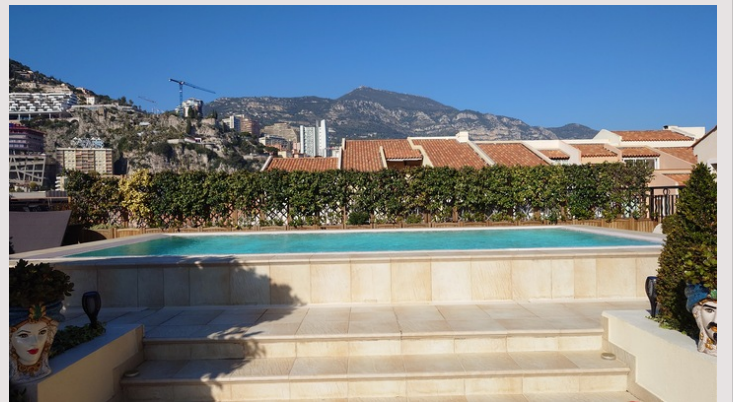

## FOR RENT FONTVIEILLE 7 ROOMS WITH PRIVATE POOL

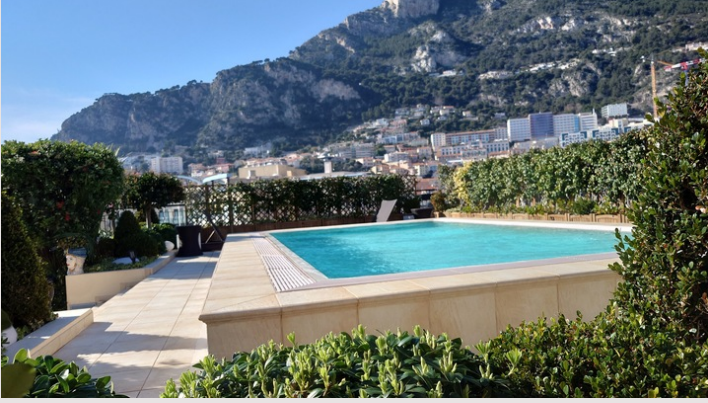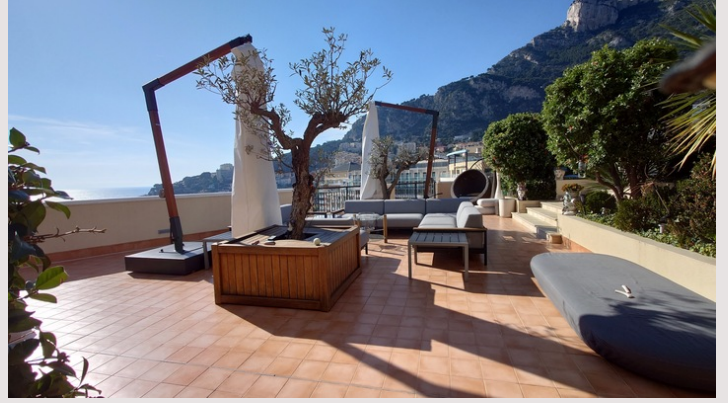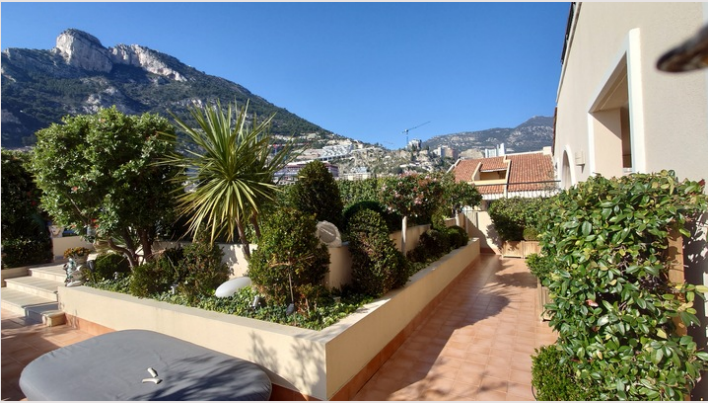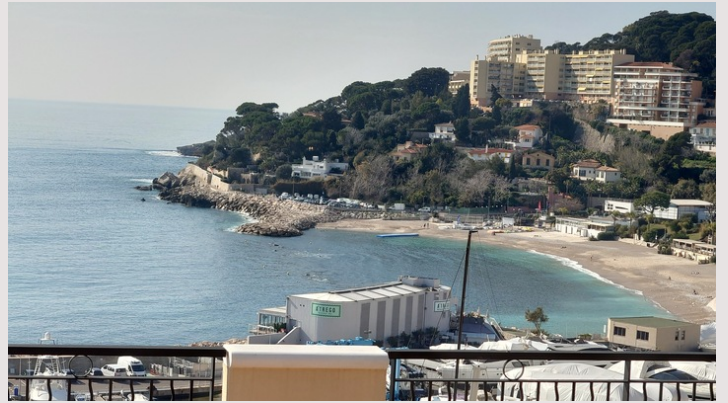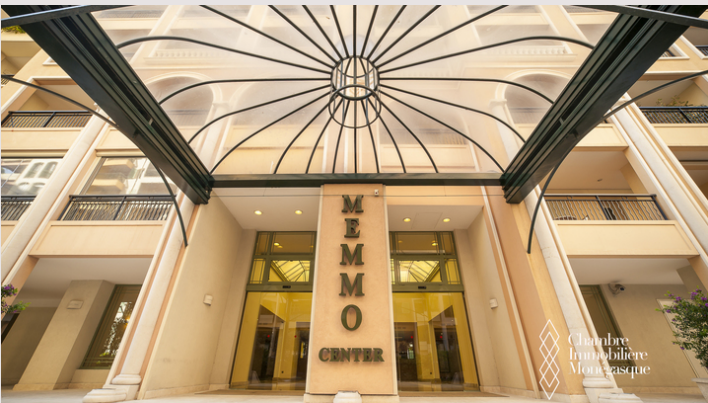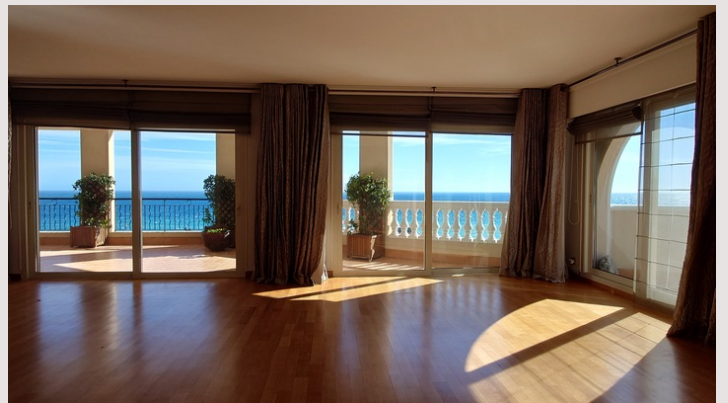



## FOR RENT FONTVIEILLE 7 ROOMS WITH PRIVATE POOL

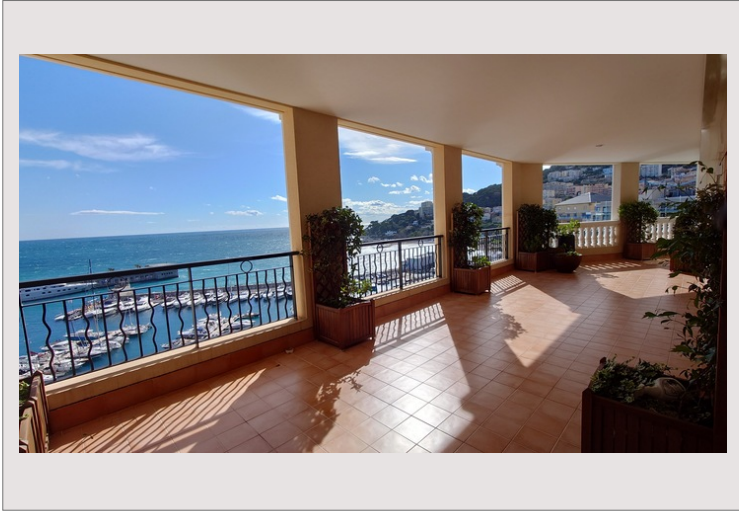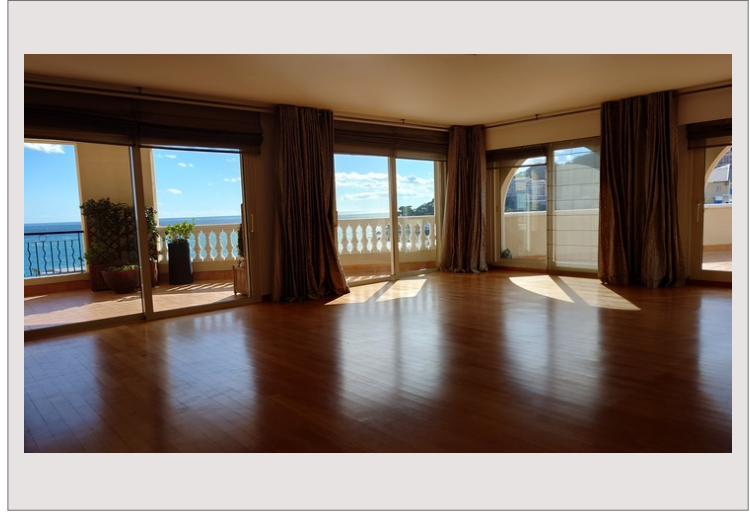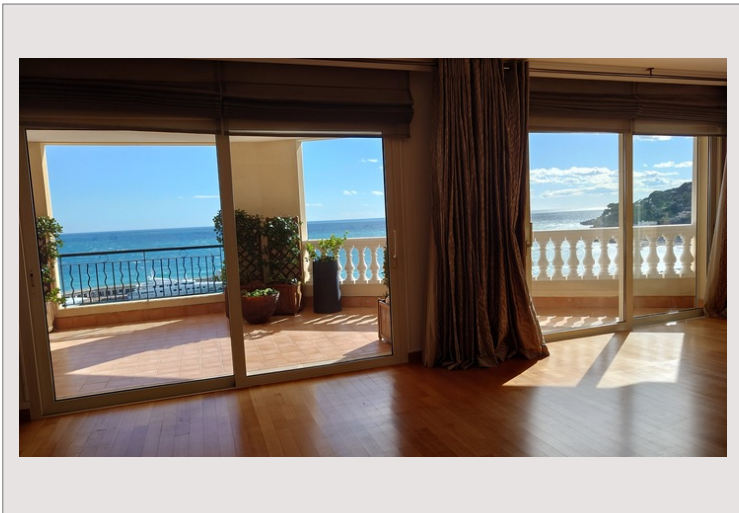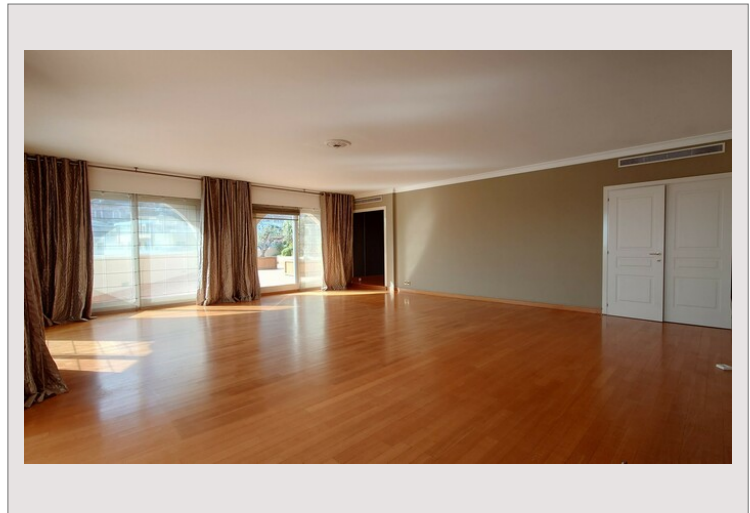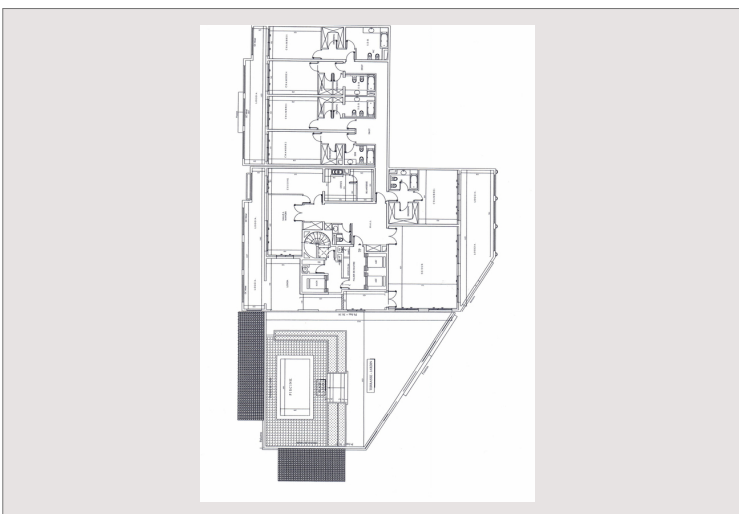

Supplement: mmc7 [file mmc7.pdf]
